# Supplementary material for: Quantum dynamics of the Br2 (B-excited state) photodissociation in superfluid helium nanodroplets: importance of the recombination process
Source: Royal Society of Chemistry journal article supplement (doi:10.1039/d2cp02984g), 2022-01-01
Supplement: d2cp02984g6.pdf [file d2cp02984g6.pdf]

## SUPPORTING INFORMATION

### Quantum dynamics of the Br<sub>2</sub> (B-excited state) photodissociation in superfluid helium nanodroplets. Importance of the recombination process

Arnau Vilà and Miguel González\*

<sup>a</sup> Departament de Ciència dels Materials i Química Física and IQTC, Universitat de Barcelona, c/ Martí i Franquès, 1, 08028 Barcelona, Spain.

#### CONTENTS

**Table s1.** Cartesian grid parameters of helium and NIPs (see page 2).

**Table s2.** Grid (*r*) of the Br<sub>2</sub>(B) molecule, propagation time steps and NIPs (see page 3).

**Table s3.** Energy (*E*) contributions (in K) at *t*=0 for Br<sub>2</sub>(B)@(He)<sub>N</sub> (see page 4).

**Figure s1.** Schematic representation of the Cartesian grid used for the helium wave function (see page 5).

**Movie 1.** Left up: time evolution of the Br<sub>2</sub>(B) relative coordinate wave packet probability density (red) and the effective potential (black). Left down: time evolution of the Br<sub>2</sub>(B) wave packet probability density in momentum representation. Right up: time evolution of the helium density in the xz-plane as a 2D plot. Right down: the same as the previous one but showing a 3D plot. The nanodroplet is formed by *N*=100 <sup>4</sup>He atoms.

**Movie 2.** As Movie 1 but for *N*=200 <sup>4</sup>He atoms.

**Movie 3.** As Movie 1 but for *N*=300 <sup>4</sup>He atoms.

**Movie 4.** As Movie 1 but for *N*=500 <sup>4</sup>He atoms.

**Movie 5.** As Movie 1 but for *N*=1000 <sup>4</sup>He atoms.

\* Corresponding author: E-mail: [miguel.gonzalez@ub.edu](mailto:miguel.gonzalez@ub.edu); Fax: +34934021231.

**Table s1.** Cartesian grid parameters of helium, NIP and propagation time step.<sup>a</sup>

| $N$  | $n_x$ | $n_y$ | $n_z$ | $h_x$<br>(Å) | $h_y$<br>(Å) | $h_z$<br>(Å) | $x_{min}$<br>(Å) | $x_{max}$<br>(Å) | $y_{min}$<br>(Å) | $y_{max}$<br>(Å) | $z_{min}$<br>(Å) | $z_{max}$<br>(Å) |
|------|-------|-------|-------|--------------|--------------|--------------|------------------|------------------|------------------|------------------|------------------|------------------|
| 100  | 110   | 110   | 326   | 0.4          | 0.4          | 0.15         | -22.0            | 21.6             | -22.0            | 21.6             | -24.45           | 24.30            |
| 200  | 120   | 120   | 386   | “            | “            | “            | -24.0            | 23.6             | -24.0            | 23.6             | -28.95           | 28.80            |
| 300  | “     | “     | 426   | “            | “            | “            | “                | “                | “                | “                | -31.95           | 31.80            |
| 500  | 130   | 130   | 454   | “            | “            | “            | -26.0            | 25.6             | -26.0            | 25.6             | -34.05           | 33.90            |
| 1000 | 190   | 190   | 520   | “            | “            | “            | -38.0            | 37.6             | -38.0            | 37.6             | -39.00           | 38.85            |

<sup>a</sup> Number of points ( $n_{x,..}$ ), spatial separation ( $h_{x,..}$ ) and minimum ( $x_{min,..}$ ) and maximum ( $x_{max,..}$ ) limits. Length of the NIP = 2.0 Å and  $A = 5171.4$  K. Propagation time step ( $\Delta t$ ) =  $7.5 \cdot 10^{-5}$  ps.

**Table s2.** Grid ( $r$ ) of the  $\text{Br}_2(\text{B})$  molecule, NIP and propagation time step.<sup>a</sup>

| $N$  | $n_r$ | $h_r$<br>(Å)          | $r_{min}$<br>(Å) | $r_{max}$<br>(Å) | $\Delta t$<br>(ps)  |
|------|-------|-----------------------|------------------|------------------|---------------------|
| 100  | 2418  | $1.796 \cdot 10^{-2}$ | 2.1              | 45.5             | $7.5 \cdot 10^{-5}$ |
| 200  | 2898  | $1.809 \cdot 10^{-2}$ | “                | 54.5             | “                   |
| 300  | 3588  | $1.750 \cdot 10^{-2}$ | “                | 69.6             | “                   |
| 500  | 3322  | $1.882 \cdot 10^{-2}$ | “                | 64.6             | “                   |
| 1000 | 3928  | $1.882 \cdot 10^{-2}$ | “                | 76.0             | “                   |

<sup>a</sup> Number of points ( $n_r$ ), spatial separation ( $h_r$ ) and minimum ( $r_{min}$ ) and maximum ( $r_{max}$ ) limits. Length of the NIP = 2.0 Å and  $A = 3315.0$  K. Propagation time step ( $\Delta t$ ) =  $7.5 \cdot 10^{-5}$  ps.

**Table s3.** Energy ( $E$ ) contributions (in K) at  $t=0$  for  $\text{Br}_2(\text{B})@(^4\text{He})_N$  as a function of  $N$ .<sup>a</sup>

| $N$  | $E(\text{He})_N$ | $E$ per atom of $(\text{He})_N$ | Kinetic $E$ of $(\text{He})_N$ | Potential $E$ of $(\text{He})_N$ |
|------|------------------|---------------------------------|--------------------------------|----------------------------------|
| 100  | -118.5           | -1.18                           | 241.6                          | -449.1                           |
| 200  | -603.7           | -3.02                           | 282.0                          | -1007.2                          |
| 300  | -1130.2          | -3.77                           | 300.9                          | -1580.0                          |
| 500  | -2239.2          | -4.48                           | 325.6                          | -2773.9                          |
| 1000 | -5162.6          | -5.16                           | 370.3                          | -5922.1                          |

| $N$  | Correlation $E$ of $(\text{He})_N$ | Interaction $E$ $\text{Br}_2(\text{B}) - (\text{He})_N$ | Kinetic $E$ $\text{Br}_2(\text{B})$ | Potential $E$ $\text{Br}_2(\text{B})$ | Total $E$ |
|------|------------------------------------|---------------------------------------------------------|-------------------------------------|---------------------------------------|-----------|
| 100  | 89.0                               | -499.1                                                  | 116.4                               | 2016.8                                | 1515.3    |
| 200  | 121.5                              | -514.2                                                  | 116.4                               | 2016.8                                | 1015.3    |
| 300  | 148.9                              | -517.5                                                  | 116.4                               | 2016.8                                | 485.5     |
| 500  | 209.1                              | -519.1                                                  | 116.4                               | 2016.8                                | -625.1    |
| 1000 | 389.1                              | -519.1                                                  | 116.4                               | 2016.8                                | -3548.5   |

<sup>a</sup>  $E(\text{He})_N$  corresponds exclusively to the total energy of helium that, according to the Orsay-Trento density functional, includes the following contributions: kinetic energy, potential energy (Lennard-Jones potential energy function) and correlation energy. The energy terms that refer exclusively to the diatomic molecule are the kinetic and the potential energy contributions. Finally, the total energy of the system is equal to the helium energy + molecule energy + helium-molecule interaction energy.

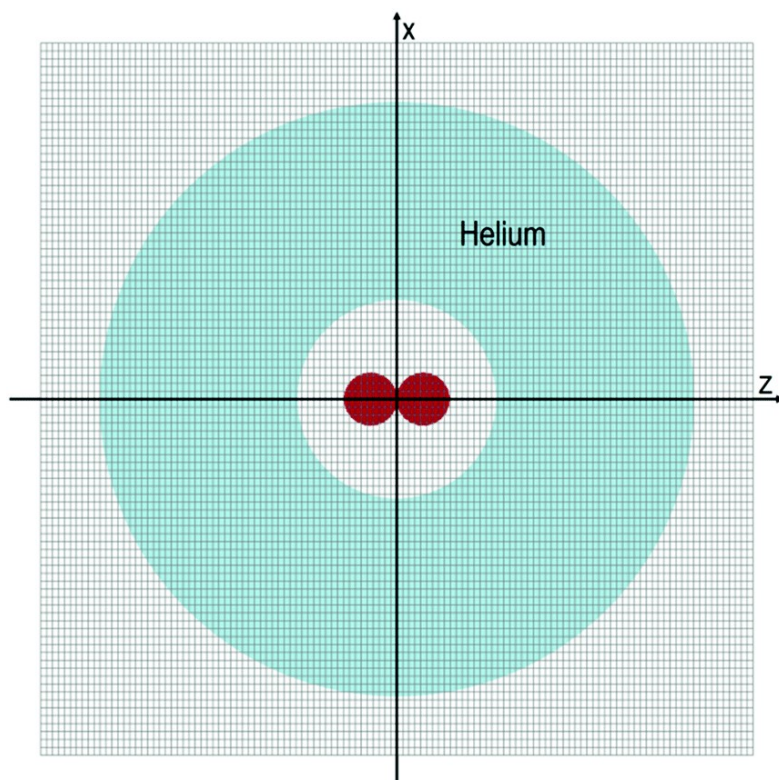

**Figure s1.** Schematic representation of the Cartesian grid used for the helium wave function (discretization in the  $xz$  plane). The blue zone corresponds to the region of the nanodroplet where the helium density takes non-negligible values and the red circles represent the diatomic molecule in the equilibrium geometry. Reproduced from ref. <sup>i</sup> with permission from the PCCP Owner Societies.

---

<sup>i</sup> M. Blancafort-Jorquera and M. González, *Phys. Chem. Chem. Phys.*, 2021, **23**, 25961.
